# Supplementary material for: Integrated genomic analysis of clear cell ovarian cancers identified PRKCI as a potential therapeutic target
Source: PubMed Central journal article supplement (PMC5722499; doi:10.18632/oncotarget.19946), 2017-08-04
Supplement: oncotarget-08-96482-s001.pdf [file oncotarget-08-96482-s001.pdf]

# Integrated genomic analysis of clear cell ovarian cancers identified PRKCI as a potential therapeutic target

## SUPPLEMENTARY MATERIALS

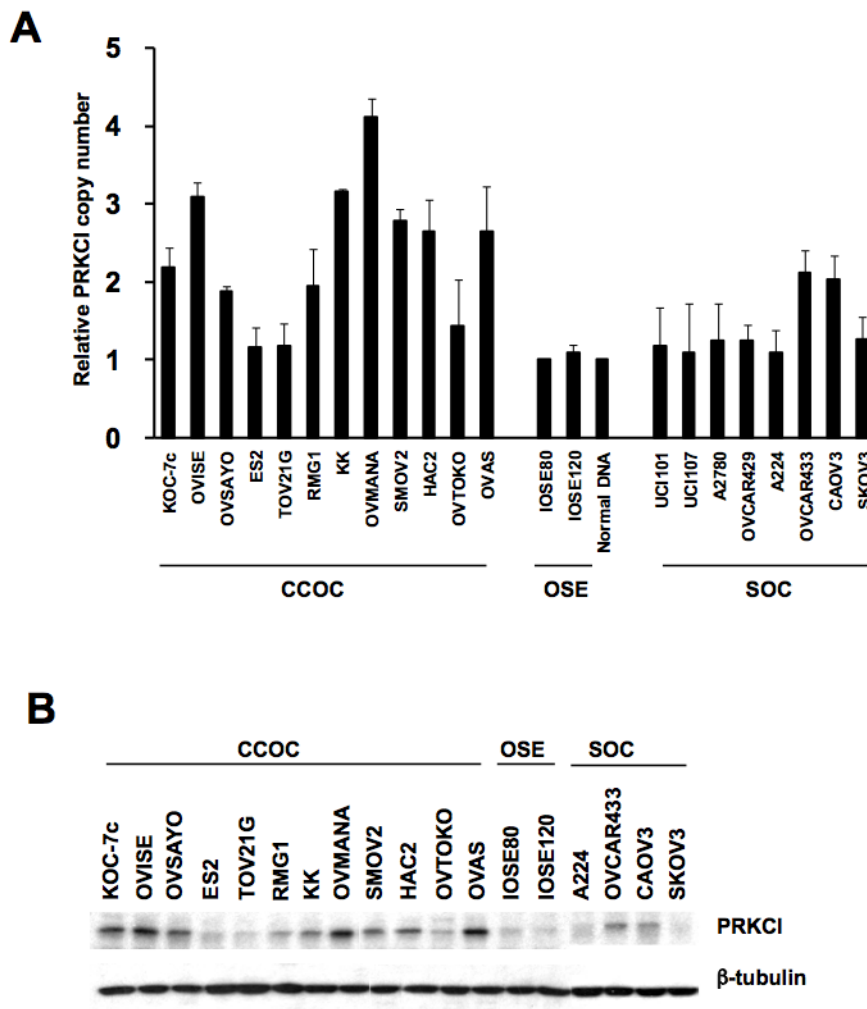

Supplementary Figure 1: Comparison of the DNA copy number and protein expression level of PRKCI in clear cell ovarian cancer (CCOC) cell lines, serous ovarian cancer (SOC) cell lines and ovarian surface epithelial (OSE) cell lines. (A) Relative DNA copy number of PRKCI as determined by qPCR. (B) Protein levels of PRKCI as determined by Western blot.

**A**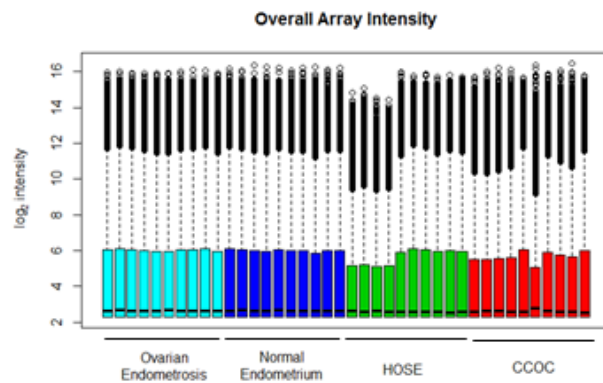**B**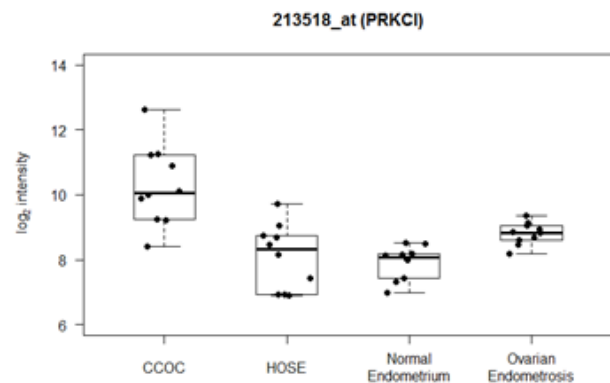

**Supplementary Figure 2: Comparison of the PRKCI expression level in CCOC, ovarian epithelial cells (HOSE), normal endometrium and ovarian endometriosis.** Microarray data for endometrium and endometriosis were retrieved from NCBI's Gene Expression Omnibus (<https://www.ncbi.nlm.nih.gov/geo/>) with the accession number of GSE7305. Raw CEL files of all samples were subjected to quantile normalization using R/Bioconductor package *gcrma*. (A) Overall array intensity after normalization suggests no significant interstudy bias. (B) Boxplot showing the level of PRKCI expression as log<sub>2</sub> probe intensity. PRKCI is significantly overexpressed in CCOC compared to other three tissue types at fold-changes of 5.22, 6.91 and 3.82 respectively (p-value:  $4.87 \times 10^{-4}$ ,  $4.33 \times 10^{-5}$  and  $2.08 \times 10^{-3}$ , by Mann-Whitney-Wilcoxon test).

**Supplementary Table S1. Amplification peaks identified by GISTIC.**

| Amplification peaks | Peak Limits               | q value   | Frequency | Number of genes in peak |
|---------------------|---------------------------|-----------|-----------|-------------------------|
| 1q44                | chr1:233113008-246874991  | 0.13427   | 5/12      | 95                      |
| 2q13                | chr2:113611779-113911005  | 0.0008108 | 5/12      | 2                       |
| 3q26.31             | chr3:169954219-178523082  | 0.22886   | 6/12      | 30                      |
| 4p16.3              | chr4:1532183-2129305      | 0.10152   | 3/12      | 11                      |
| 4q32.1              | chr4:159421407-159792448  | 0.011976  | 1/12      | 1                       |
| 6q26                | chr6:161390383-162077009  | 0.23303   | 1/12      | 3                       |
| 8q11.23             | chr8:43647064-55533891    | 0.021335  | 5/12      | 22                      |
| 8q24.3              | chr8:138686236-141886722  | 0.059432  | 5/12      | 8                       |
| 10q24.1             | chr10:98847154-99432221   | 0.05277   | 5/12      | 16                      |
| 11q13.3             | chr11:70081659-70971957   | 0.018447  | 3/12      | 8                       |
| 11q22.1             | chr11:99716458-101536280  | 0.020398  | 3/12      | 8                       |
| 12q24.31            | chr12:123934406-124115384 | 0.05277   | 6/12      | 3                       |
| 17q22               | chr17:53582424-56121846   | 0.00034   | 7/12      | 40                      |
| 19q12               | chr19:33432676-44172883   | 0.010038  | 5/12      | 130                     |
| 20q11.22            | chr20:33059672-33669568   | 0.0088789 | 7/12      | 11                      |
| 20q13.2             | chr20:51268052-51994180   | 8.34E-06  | 10/12     | 3                       |

**Supplementary Table S2. Genes with copy number amplification and overexpression.**

| Amplification peak | Amplified and overexpressed genes                               |
|--------------------|-----------------------------------------------------------------|
| 1q44               | RBM34, ARID4B, ARID4B, MTR, FH, ADSS, PPPDE1, HNRNPU            |
| 2q13               | PSD4, PAX8                                                      |
| 3q26.31            | ECT2, PRKCI, GPR160, MYNN                                       |
| 4p16.3             | TMEM129, FGFR3, WHSC1                                           |
| 8q11.23            | PRKDC, MCM4, UBE2V2, PCMTD1, RB1CC1, ATP6V1H, LYPLA1, MRPL15    |
| 8q24.3             | PTK2                                                            |
| 12q24.31           | BRI3BP                                                          |
| 17q22              | MKS1, MTMR4, PRR11, PTRH2, TMEM49, TUBD1, APPBP2                |
| 19q12              | CEBPG, LSM14A, GPI, COX6B1, PSENEN, LIN37, ZNF146, ZNF566, ECH1 |
| 20q11.22           | EIF6                                                            |
| 20q13.2            | ZNF217                                                          |

**Supplementary Table S3. Relationships between PRKCI expression and clinicopathological parameters in 40 CCOC patients.**

| Variable                                 | Case<br>(n = 40) | PRKCI expression          |                            | P-value <sup>a</sup> |
|------------------------------------------|------------------|---------------------------|----------------------------|----------------------|
|                                          |                  | Low, No. (%),<br>(n = 16) | High, No. (%),<br>(n = 24) |                      |
| <b>Age</b>                               |                  |                           |                            |                      |
| <50                                      | 11               | 5 (31.2)                  | 6 (25.0)                   | 0.6645               |
| ≥50                                      | 29               | 11 (68.8)                 | 18 (75.0)                  |                      |
| <b>FIGO stage</b>                        |                  |                           |                            |                      |
| I + II                                   | 31               | 14 (87.5)                 | 17 (70.8)                  | 0.2162               |
| III + IV                                 | 9                | 2 (12.5)                  | 7 (29.2)                   |                      |
| <b>T stage</b>                           |                  |                           |                            |                      |
| T1                                       | 27               | 14 (87.5)                 | 13 (54.2)                  | 0.0876               |
| T2                                       | 6                | 1 (6.25)                  | 5 (20.8)                   |                      |
| T3                                       | 7                | 1 (6.25)                  | 6 (25.0)                   |                      |
| <b>Regional lymph nodes <sup>b</sup></b> |                  |                           |                            |                      |
| N0                                       | 32               | 13 (92.9)                 | 19 (90.5)                  | 0.8053               |
| N1                                       | 3                | 1 (7.14)                  | 2 (9.52)                   |                      |
| <b>Distant metastasis <sup>c</sup></b>   |                  |                           |                            |                      |
| M0                                       | 37               | 14 (100)                  | 23 (95.8)                  | 0.4389               |
| M1                                       | 1                | 0 (0.00)                  | 1 (4.17)                   |                      |

<sup>a</sup> P-values were calculated using Pearson's chi-square test. P-values were considered significant when < 0.05.

<sup>b</sup> Regional lymph nodes cannot be assessed in 5 cases.

<sup>c</sup> Distant metastasis cannot be assessed in 2 cases.
